# Supplementary material for: Structural basis of V-ATPase VO region assembly by Vma12p, 21p, and 22p
Source: PubMed Central journal article supplement — Proc Natl Acad Sci U S A. 2023 Feb 1;120(6):e2217181120. doi: 10.1073/pnas.2217181120 (PMC9963935; doi:10.1073/pnas.2217181120), 2023-02-01
Supplement: pnas.2217181120.sapp.pdf [file pnas.2217181120.sapp.pdf]

## **Supporting Information for Structural basis of V-ATPase V<sub>o</sub> region assembly by Vma12p, 21p, and 22p**

Hanlin Wang, Stephanie A. Bueler, John L. Rubinstein

John L. Rubinstein

Email: [john.rubinstein@utoronto.ca](mailto:john.rubinstein@utoronto.ca)

### **This PDF file includes:**

- Figures S1 to S9
- Tables S1 to S2
- Legend for Movie S1
- Legend for Dataset S1

### **Other supporting materials for this manuscript include the following:**

- Movie S1
- Dataset S1

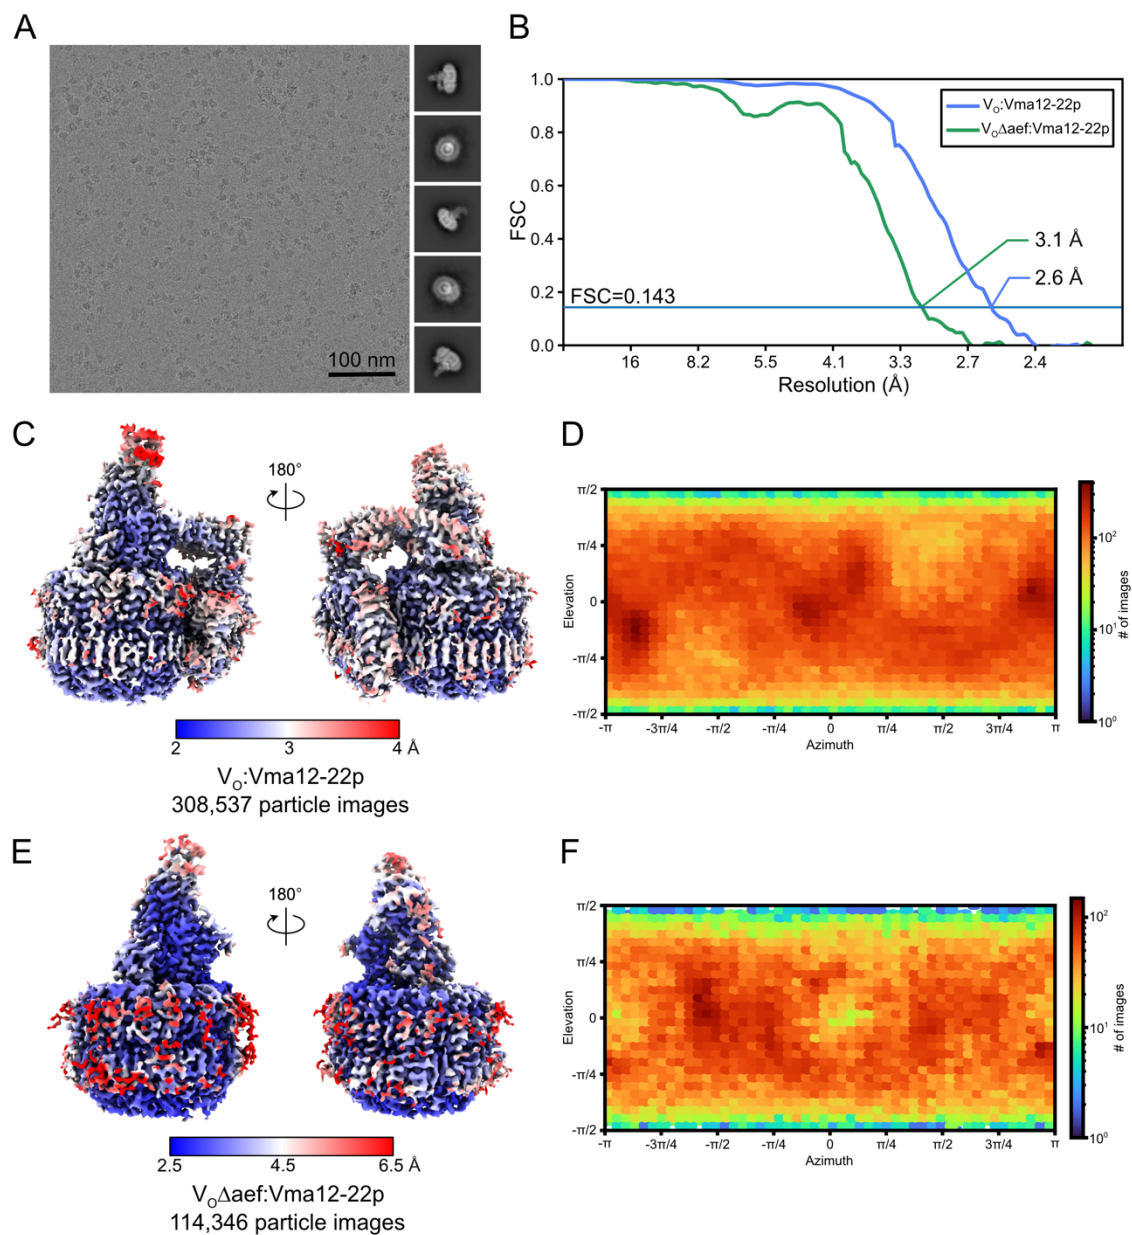

**Fig. S1. CryoEM of the  $V_o$ :Vma12-22p complex.** **A**, Example micrograph and 2D class average images. **B**, Fourier shell correlation curves, corrected for masking, after gold-standard refinement for  $V_o$ :Vma12-22p and  $V_o\Delta aef$ :Vma12-22p. **C**, Local resolution map for  $V_o$ :Vma12-22p. **D**, Orientation distribution plot for  $V_o$ :Vma12-22p. **E**, Local resolution map for  $V_o\Delta aef$ :Vma12-22p. **F**, Orientation distribution plot for  $V_o\Delta aef$ :Vma12-22p.

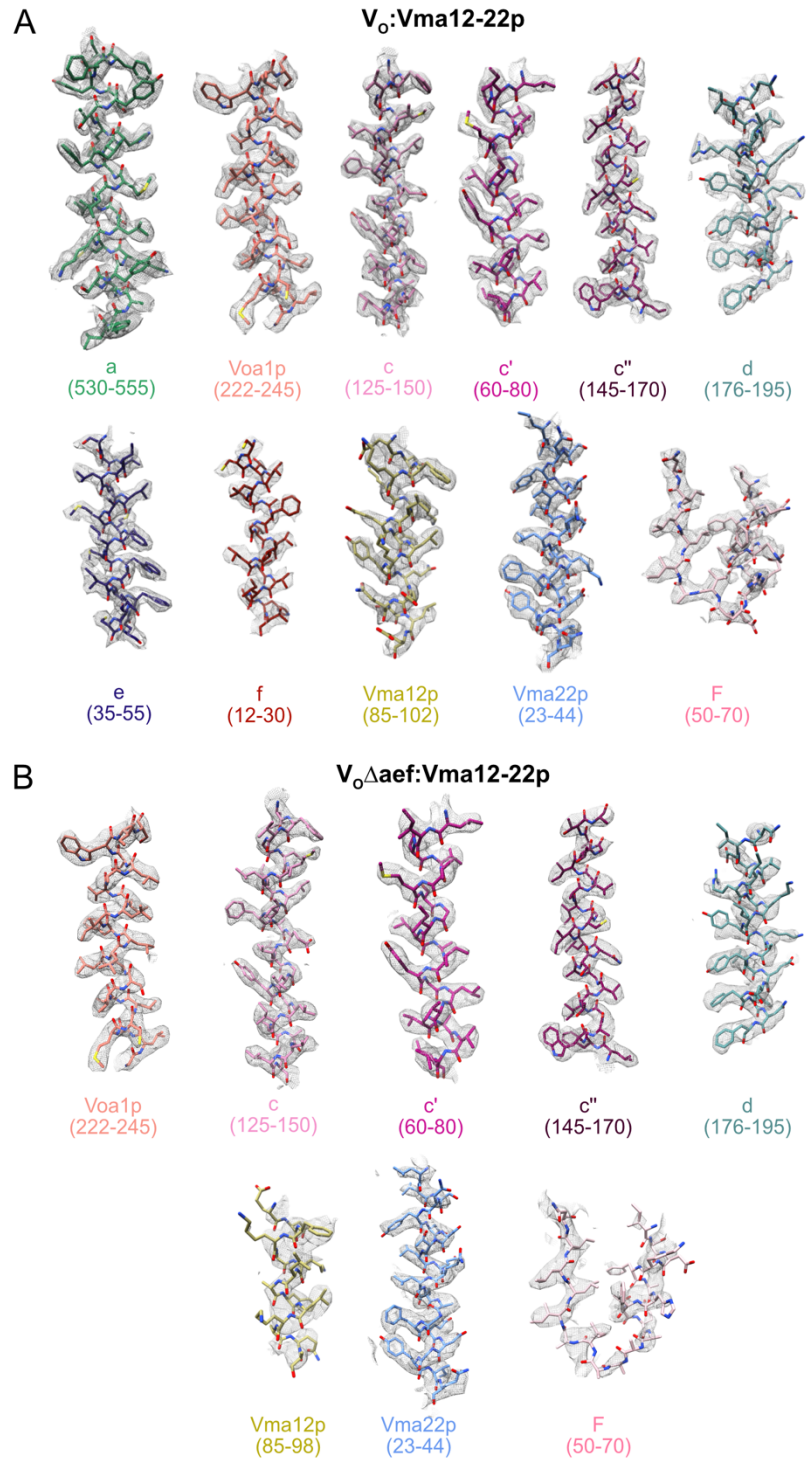

**Fig. S2. Model-in-map fit examples.** Examples of the atomic model fit in the cryoEM map of  $V_o$ :Vma12-22p (**A**) and  $V_o\Delta aef$ :Vma12-22p (**B**).

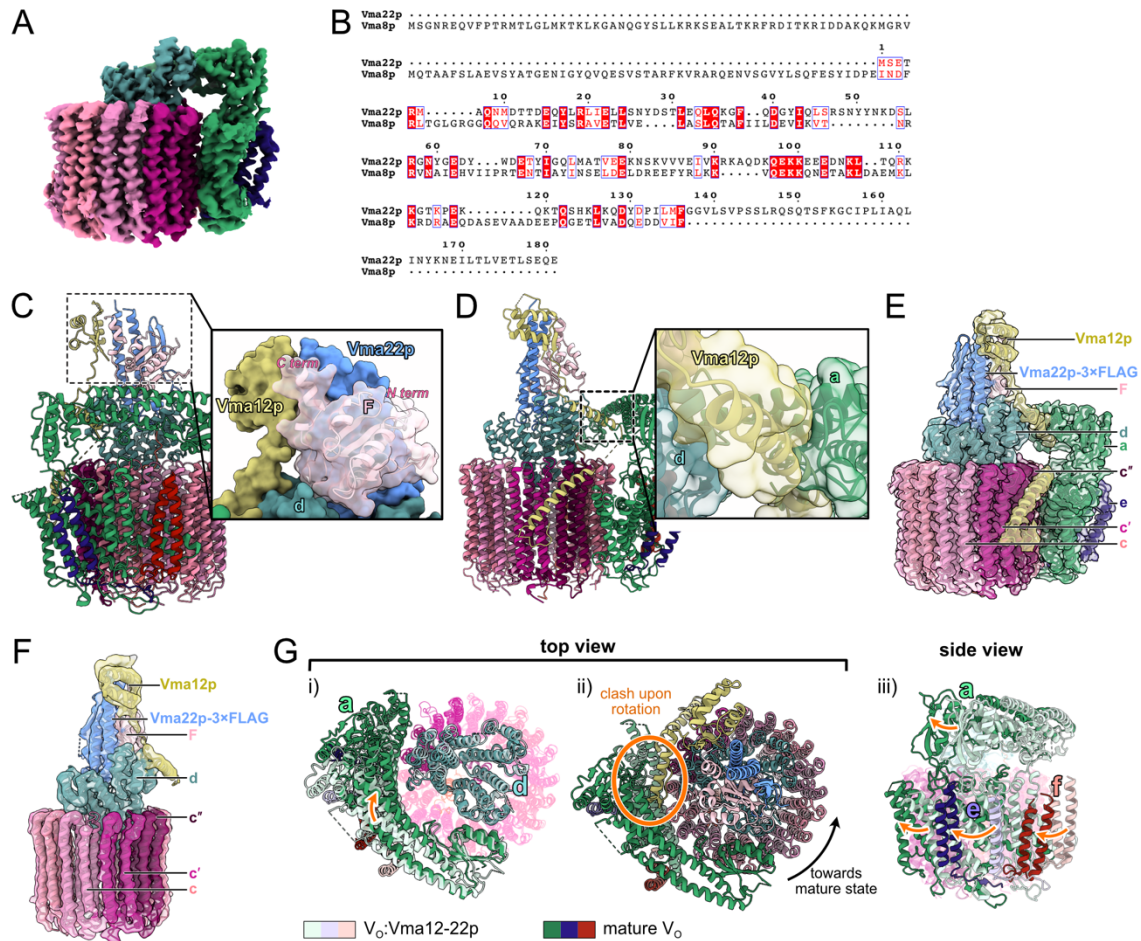

**Fig. S3. Structural features of the Vma12-22p complex.** **A**, Re-analysis of a published data of  $V_0$  images does not reveal  $V_0\Delta aef$  complexes. **B**, Protein sequence alignment between Vma22p and Vma8p (subunit D from  $V_1$  complex). Red boxes indicate identical residues and white boxes indicate similar residues. **C**, Subunit F binds Vma12p and Vma22p and mediates their association. **D**, Vma12p interacts with subunits a and d through an  $\alpha$  helix. **E**, CryoEM map of  $V_0$ :Vma12-22p from the Vma22p-3 $\times$ FLAG preparation with a model of  $V_0$ :Vma12-22p from Vma12p-3 $\times$ FLAG fitted. **F**, CryoEM map of  $V_0\Delta aef$ :Vma12-22p from the Vma22p-3 $\times$ FLAG preparation with a model of  $V_0$ :Vma12-22p from Vma12p-3 $\times$ FLAG fitted. **G**, Movement of subunits a, e, and f relative to the c ring when the c ring transitions to its orientation in the mature  $V_0$  complex.

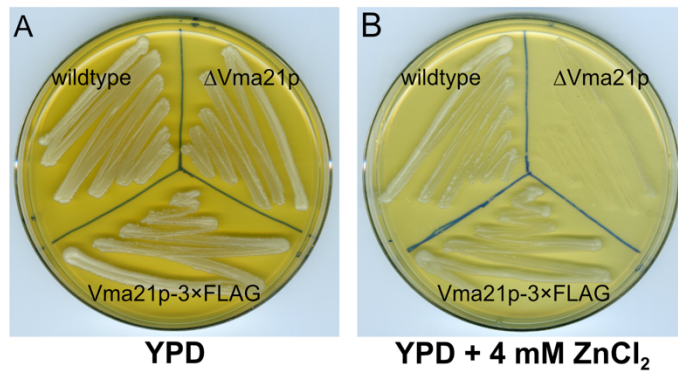

**Fig. S4. Integration of a 3×FLAG tag to Vma21p does not compromise V-ATPase function.** Comparison of yeast growth for wildtype,  $\Delta$ Vma21p, and Vma21p-3×FLAG yeast strains on YPD (**A**), and YPD with 4 mM of ZnCl<sub>2</sub> (**B**). Deletion of Vma21p produces a *VMA*<sup>-</sup> V-ATPase deficiency phenotype but addition of a C-terminal 3×FLAG tag to Vma21p does not cause the phenotype.

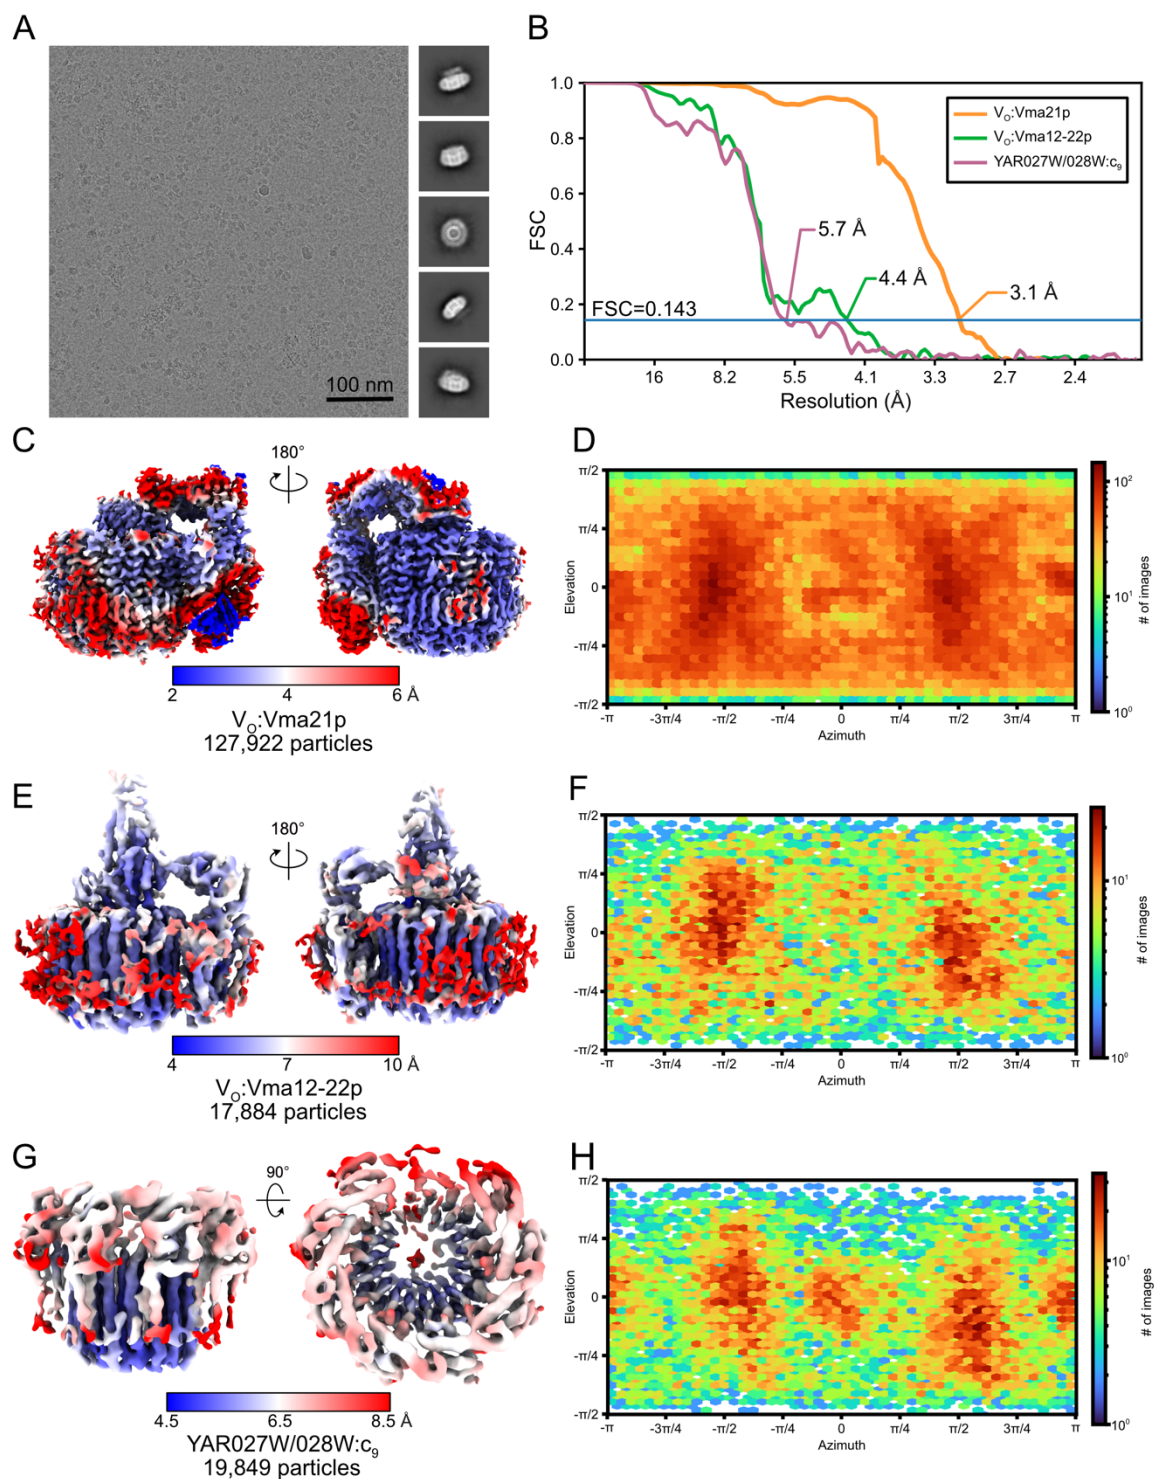

**Fig. S5. CryoEM of the Vma21p-3\*FLAG preparation.** **A**, Example micrograph and 2D class average images. **B**, Fourier shell correlation curves, corrected for masking, after gold-standard refinement for  $V_0:Vma21p$ ,  $V_0:Vma12-22p$ , and  $YAR027W/028W:c_9$ . **C**, Local resolution map for  $V_0:Vma21p$ . **D**, Orientation distribution plot for  $V_0:Vma21p$ . **E**, Local resolution map for  $V_0:Vma12-22p$ . **F**, Orientation distribution plot for  $V_0:Vma12-22p$ . **G**, Local resolution maps for  $YAR027W/028W:c_9$ . **H**, Orientation distribution plot for  $YAR027W/028W:c_9$ .

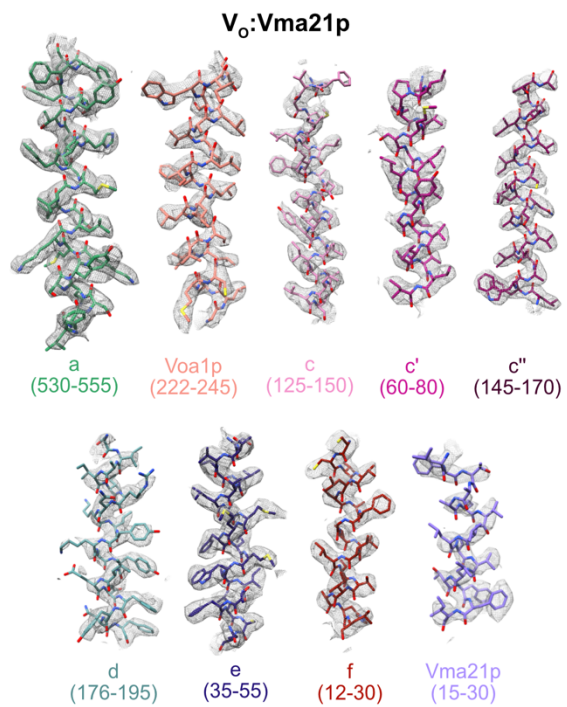

**Fig. S6. Model-in-map fit examples.** Examples of the atomic model fit in the cryoEM map of V<sub>o</sub>:Vma21p.

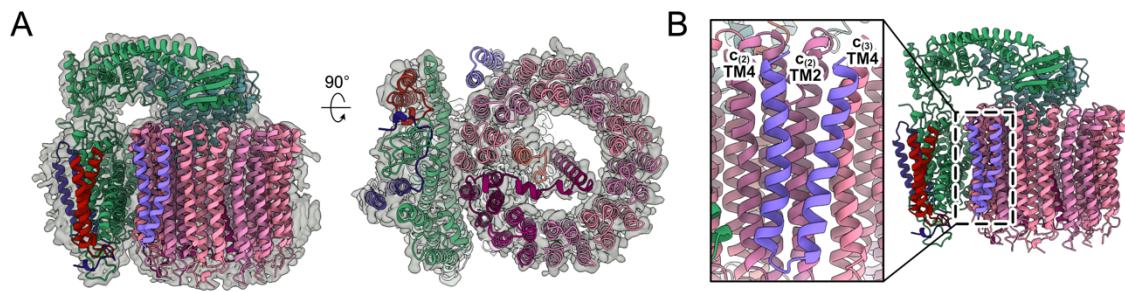

**Fig. S7. Comparison of the structure of  $V_0$ :Vma21p complex and mature  $V_0$ .** **A**, Fitting of the  $V_0$ :Vma21p model into the previously-determined  $V_0$  map (EMDB: 0644). **B**, Binding location of Vma21p on the c ring.



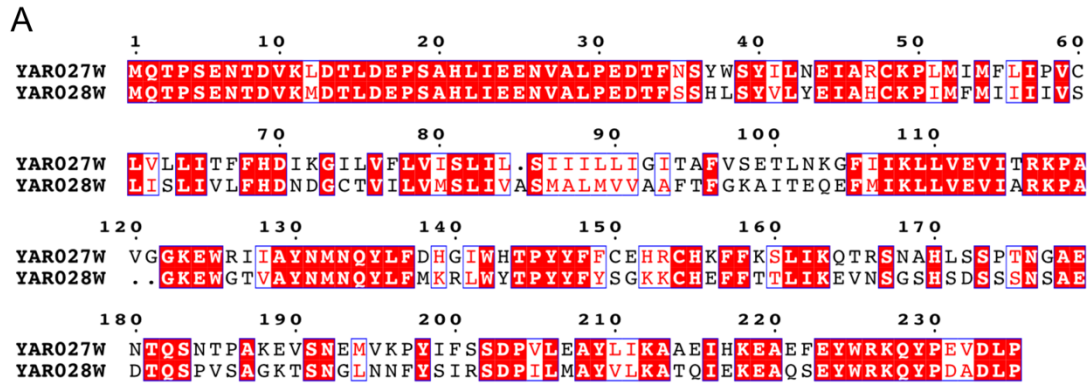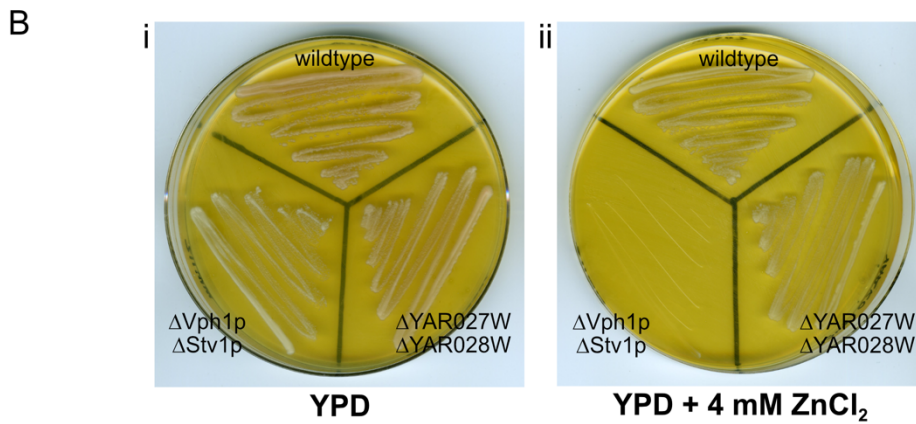

**Fig. S8. YAR027W and YAR028W. A**, Protein sequence alignment between YAR027W and YAR028W. Red boxes indicate identical residues and white boxes indicate similar residues. **B**, Comparison of yeast growth for wildtype,  $\Delta Vph1p\Delta Stv1p$ , and  $\Delta YAR027W\Delta YAR028W$  yeast strains on YPD (i), and YPD with 4 mM of  $ZnCl_2$  (ii). Simultaneous deletion of YAR027W and YAR028W does not cause the  $VMA^-$  V-ATPase deficiency phenotype, which is seen in the  $\Delta Vph1p\Delta Stv1p$  strain used as a positive control.

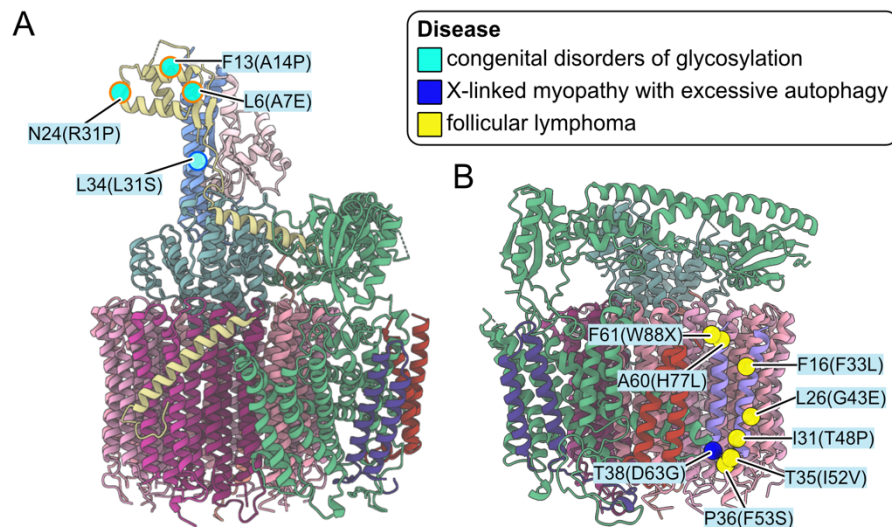

**Fig. S9. Disease-associated mutations in human TMEM199, VMA21, and CCDC115 that map onto yeast Vma12p, Vma21p, and Vma22p. A,** Mutations of TMEM199 and CCDC115 associated with congenital disorders of glycosylation that map onto yeast Vma12p and Vma22p. **B,** Mutations of VMA21 associated with X-linked myopathy with excessive autophagy and follicular lymphoma that map onto yeast Vma21p. Yeast residues are indicated with disease causing human mutations in brackets.

**Table S1.** CryoEM map calculation and atomic model construction statistics.

|                                                     | V <sub>0</sub> :Vma12-22p<br>(EMD-27984,<br>PDB 8EAS) | V <sub>0</sub> :Vmaef:Vma12-22p<br>(EMD-27985, PDB<br>8EAT) | V <sub>0</sub> :Vma21p<br>(EMD-27986,<br>PDB 8EAU) | YAR027W/028W:c <sub>9</sub><br>(from Vma21p dataset)<br>(EMD-27987, PDB<br>8EAV) | V <sub>0</sub> :Vma12-22p<br>(from Vma21p dataset)<br>(EMD-27988) |
|-----------------------------------------------------|-------------------------------------------------------|-------------------------------------------------------------|----------------------------------------------------|----------------------------------------------------------------------------------|-------------------------------------------------------------------|
| <b>Data collection &amp; Processing</b>             |                                                       |                                                             |                                                    |                                                                                  |                                                                   |
| Magnification                                       | 75,000                                                | 75,000                                                      | 75,000                                             | 75,000                                                                           | 75,000                                                            |
| Voltage (kV)                                        | 300                                                   | 300                                                         | 300                                                | 300                                                                              | 300                                                               |
| Electron exposure (e <sup>-</sup> /Å <sup>2</sup> ) | 45                                                    | 45                                                          | 49                                                 | 49                                                                               | 49                                                                |
| Exposure rate (e <sup>-</sup> /pixel/s)             | 6.7                                                   | 6.7                                                         | 6.3                                                | 6.3                                                                              | 6.3                                                               |
| Exposure time (s)                                   | 7.2                                                   | 7.2                                                         | 8.3                                                | 8.3                                                                              | 8.3                                                               |
| Defocus range (μm)                                  | 0.5-2                                                 | 0.5-2                                                       | 0.5-2                                              | 0.5-2                                                                            | 0.5-2                                                             |
| Pixel size (Å)                                      | 1.03                                                  | 1.03                                                        | 1.03                                               | 1.03                                                                             | 1.03                                                              |
| Symmetry imposed                                    | C1                                                    | C1                                                          | C1                                                 | C1                                                                               | C1                                                                |
| Initial particle images (no.)                       | 462,692                                               | 462,692                                                     | 607,746                                            | 607,746                                                                          | 607,746                                                           |
| Final particle images (no.)                         | 308,537                                               | 114,346                                                     | 127,922                                            | 19,849                                                                           | 17,884                                                            |
| Map resolution (Å)                                  | 2.6                                                   | 3.1                                                         | 3.1                                                | 5.7                                                                              | 4.4                                                               |
| FSC threshold                                       | 0.143                                                 | 0.143                                                       | 0.143                                              | 0.143                                                                            | 0.143                                                             |
| Map resolution range (Å)                            | 2.3-4.8                                               | 2.6-6.1                                                     | 2.2-7.5                                            | 4.6-9.2                                                                          | 3.9-11.5                                                          |
| <b>Refinement</b>                                   |                                                       |                                                             |                                                    |                                                                                  |                                                                   |
| Initial model used (PDB code)                       | 6O7T                                                  | 6O7T                                                        | 6O7T                                               | 6O7T                                                                             |                                                                   |
| Model resolution (Å)                                | 2.7                                                   | 3.2                                                         | 3.2                                                | 6.3                                                                              |                                                                   |
| FSC threshold                                       | 0.5                                                   | 0.5                                                         | 0.5                                                | 0.5                                                                              |                                                                   |
| Map sharpening B factor (Å <sup>2</sup> )           | locally sharpened                                     | locally sharpened                                           | locally sharpened                                  | Locally sharpened                                                                |                                                                   |
| Model composition                                   |                                                       |                                                             |                                                    |                                                                                  |                                                                   |
| Non-hydrogen atoms                                  | 24810                                                 | 17204                                                       | 21919                                              | 14467                                                                            |                                                                   |
| Protein residues                                    | 3280                                                  | 2349                                                        | 2946                                               | 2890                                                                             |                                                                   |
| Ligands                                             | 0                                                     | 0                                                           | 0                                                  | 0                                                                                |                                                                   |
| R.m.s deviations                                    |                                                       |                                                             |                                                    |                                                                                  |                                                                   |
| Bond lengths (Å)                                    | 0.006                                                 | 0.004                                                       | 0.004                                              | 0.015                                                                            |                                                                   |
| Bond angles (°)                                     | 0.635                                                 | 0.546                                                       | 0.636                                              | 2.359                                                                            |                                                                   |
| Validation                                          |                                                       |                                                             |                                                    |                                                                                  |                                                                   |
| MolProbity score                                    | 1.48                                                  | 1.45                                                        | 1.48                                               | 2.73                                                                             |                                                                   |
| Clashscore                                          | 8.92                                                  | 5.83                                                        | 9.07                                               | 44.32                                                                            |                                                                   |
| Poor rotamers (%)                                   | 0.00                                                  | 0.00                                                        | 0.00                                               | 0.00                                                                             |                                                                   |
| Ramachandran plot                                   |                                                       |                                                             |                                                    |                                                                                  |                                                                   |
| Favored (%)                                         | 98.61                                                 | 97.28                                                       | 98.35                                              | 87.78                                                                            |                                                                   |
| Allowed (%)                                         | 1.39                                                  | 2.72                                                        | 1.65                                               | 8.38                                                                             |                                                                   |
| Disallowed (%)                                      | 0.00                                                  | 0.00                                                        | 0.00                                               | 3.84                                                                             |                                                                   |

**Table S2.** DNA primers used for strain construction and confirmation.

| Yeast strain                             | forward primer with plasmid pJT1                                                                  | reverse primer with plasmid pJT1                                                                    | forward confirmation primer                                                                                 | reverse confirmation primer                                                                              |
|------------------------------------------|---------------------------------------------------------------------------------------------------|-----------------------------------------------------------------------------------------------------|-------------------------------------------------------------------------------------------------------------|----------------------------------------------------------------------------------------------------------|
| <b>SABY125</b><br>(Vma12p-3×FLAG)        | 5' - AAGAAAA<br>CAAAGGTTGAGAAAAAGA<br>AAGTTCTAAGCAAGATTA<br>CACTGGACTACAAAGACC<br>ATGACGG-3'      | 5' - AAGAATTAT<br>ATGCTCTCGGATCTCGGA<br>GTTCTTATTTATAAAATG<br>ATCAGATATCATCGATGA<br>ATTTCGAGCTCG-3' | (5' junction)<br>5' -GCCATT<br>TGGTACTGGACCGG-3'                                                            | (5' junction)<br>5' -GAGCGA<br>CCTCATACTATACC-3'                                                         |
| <b>SABY129</b><br>(Vma21p-3×FLAG)        | 5' -<br>TCCGCGAGGATACTGAAG<br>ATCACAAAGTTGATGGTA<br>ATAAAAAGGAAGACGACT<br>ACAAAGACCATGACGG-<br>3' | 5' -CCTCTACTA<br>TTTTTCTTGATATTTCTC<br>TTCTAGCAACATATACTA<br>CTCAAATATCATCGATGA<br>ATTTCGAGCTCG-3'  | (5' junction)<br>5' -GTAGAT<br>GTTCTCGTGC GG TG-3'                                                          | (5' junction)<br>5' -GAGCGA<br>CCTCATACTATACC-3'                                                         |
| <b>SABY130</b><br>(Vma22p-3×FLAG)        | 5' -ATTACAAGA<br>ACGAAATATTAACGTTGG<br>TTGAAACGTTGTCTGAGC<br>AGGAAGACTACAAAGACC<br>ATGACGG-3'     | 5' -CTTCAAATA<br>TACACGTATGTATTTT<br>CTTTTACTATATTCTTA<br>ACTCTATATCATCGATGA<br>ATTTCGAGCTCG-3'     | (5' junction)<br>5' -TGGTGG<br>AGTACTGTCCGTTCC-3'                                                           | (5' junction)<br>5' -GAGCGA<br>CCTCATACTATACC-3'                                                         |
| <b>SABY149</b><br>(ΔYAR027W<br>ΔYAR028W) | 5' -ACCTCCAAA<br>ACCATATAATAACCTTAC<br>ACAAGACAAGATATCAAT<br>TCAACGGCGCCCACTTC<br>TAAATAAGC-3'    | 5' -TCTCGTTTT<br>AAAGAAAAGTAAGTATAC<br>TTGGTGAATAAAATGCTT<br>CCGCTATATCATCGATGA<br>ATTTCGAGCTCG-3'  | (5' junction)<br>5' -AAAGCT<br>CAATTAGTATCATGATC-3'<br><br>(3' junction)<br>5' -CGACAT<br>CATCTGCCCAGATG-3' | (5' junction)<br>5' -GAGCGA<br>CCTCATACTATACC-3'<br><br>(3' junction)<br>5' -GATGCT<br>CAATTCTGGCTTCG-3' |

**Movie S1 (separate file).** Movie S1. Model for the sequence of events in  $V_O$  assembly.

**Dataset S1 (separate file).** Mass spectrometry identification of proteins purified with Vma21p-3×FLAG preparation.
